# Supplementary material for: Regional heterogeneities of oligodendrocytes underlie biased Ranvier node spacing along single axons in sound localization circuit
Source: eLife. 2025 Dec 23;14:RP106415. doi: 10.7554/eLife.106415 (PMC12726825; doi:10.7554/eLife.106415)
Supplement: Figure 1—source data 1. [file elife-106415-fig1-data1.xlsx]

## Sheet: Figure 1H
Proportion of nodes
Observed frequency						Expected frequency					Chi-square statistic					Chi-square value		p value
	heminode	immature node	mature node	total			heminode	immature node	mature node			heminode	immature node	mature node
E15 Tract	167	11	4	182		E15 Tract	172.368	5.5766	4.05571		E15 Tract	0.167155	5.2744	0.000765251		11.0384		0.00400908
E15 NL	173	0	4	177		E15 NL	167.632	5.4234	3.94429		E15 NL	0.171877	5.4234	0.000786869
total	340	11	8	359
	heminode	immature node	mature node	total			heminode	immature node	mature node			heminode	immature node	mature node
E18 Tract	138	183	23	344		E18 Tract	175.66	144.694	23.6465		E18 Tract	8.07382	10.1411	0.0176744		41.7232		8.70788e-10
E18 NL	174	74	19	267		E18 NL	136.34	112.306	18.3535		E18 NL	10.4022	13.0657	0.0227715
total	312	257	42	611
	heminode	immature node	mature node	total			heminode	immature node	mature node			heminode	immature node	mature node
E21 Tract	35	134	98	267		E21 Tract	34.7351	121.782	110.483		E21 Tract	0.00202006	1.22577	1.41035		4.53674		0.103481
E21 NL	48	157	166	371		E21 NL	48.2649	169.218	153.517		E21 NL	0.00145379	0.882155	1.015
total	83	291	264	638
	heminode	immature node	mature node	total			heminode	immature node	mature node			heminode	immature node	mature node
P3 Tract	9	9	208	226		P3 Tract	11.6897	9.21003	205.1		P3 Tract	0.618859	0.00478969	0.0409955		1.02923		0.597731
P3 NL	24	17	371	412		P3 NL	21.3103	16.79	373.9		P3 NL	0.339471	0.00262735	0.0224878
total	33	26	579	638
