# Supplementary material for: Regional heterogeneities of oligodendrocytes underlie biased Ranvier node spacing along single axons in sound localization circuit
Source: eLife. 2025 Dec 23;14:RP106415. doi: 10.7554/eLife.106415 (PMC12726825; doi:10.7554/eLife.106415)
Supplement: Figure 2—source data 1. [file elife-106415-fig2-data1.xlsx]

## Sheet: Figure 2G
Internodal length (um)					PlotsOfDifferences - Plots all Of the Data and Differences
						Condition	n	mean	sd	sem	median	MAD	95CI median
E18_Tract	E18_NL	P9_Tract	P9_NL		1	E18_NL	38	53.42	23.05	3.79	50	10	40 - 60
110	50	200	70		2	E18_Tract	41	170.98	44.43	7.02	190	30	160 - 190
240	40	280	140		3	P9_NL	62	67.74	24.92	3.19	70	15	60 - 70
200	50	270	110		4	P9_Tract	43	211.16	62.19	9.6	220	40	190 - 240
230	40	210	30
180	50	190	50		PlotsOfDifferences - Plots all Of the Data and Differences
200	40	210	100			Condition	difference	CI_lo	CI_hi	p_median
150	60	140	60		1	E18_NL				1
150	30	60	30		2	E18_Tract	133.79	109.875	150	<0.001
190	30	100	50		3	P9_NL	16.105		30	0.002
190	40	170	60		4	P9_Tract	166.71	140	190	<0.001
190	60	230	60
180	60	240	60
190	70	140	90
180	40	300	90
130	70	170	90
130	80	250	50
200	50	250	100
200	110	230	110
240	40	250	90
150	70	260	110
190	60	220	30
220	80	140	70
210	40	140	70
200	60	110	50
210	50	360	30
110	20	310	90
160	40	190	80		Shapiro-Wilk normality test
150	20	260	90			E18_Tract	W = 0.93266, p-value = 0.01772
110	50	110	70			E18_NL	W = 0.92984, p-value = 0.01982
190	30	230	80			P9_Tract	W = 0.98624, p-value = 0.8789
220	20	180	70			P9_NL	W = 0.87053, p-value = 3.655e-06
80	110	250	100
140	30	280	100		Kruskal-Wallis rank sum test
190	30	260	80			Kruskal-Wallis chi-squared = 129.94, df = 3, p-value < 2.2e-16
200	60	150	60
120	70	210	60		post hoc Steel-Dwass test
170	100	170	60					t p
30	80	280	80				E18_Tract vs. E18_NL	1:2 7.267701 2.221556e-12
160		250	40				E18_Tract vs. P9_Tract	1:3 3.255369 6.228629e-03
190		230	90					1:4 7.978423 6.317169e-14
130		220	60					2:3 7.578332 2.351452e-13
		200	80				E18_NL vs. P9_NL	2:4 2.478451 6.329645e-02
		180	60				P9_Tract vs. P9_NL	3:4 8.451905 3.952394e-14
			60
			70
			40
			70
			60
			60
			70
			80
			30
			30
			70
			20
			20
			90
			30
			60
			60
			70
			60
