# Supplementary material for: Regional heterogeneities of oligodendrocytes underlie biased Ranvier node spacing along single axons in sound localization circuit
Source: eLife. 2025 Dec 23;14:RP106415. doi: 10.7554/eLife.106415 (PMC12726825; doi:10.7554/eLife.106415)
Supplement: Figure 3—source data 1. [file elife-106415-fig3-data1.xlsx]

## Sheet: Figure 3E
Myelin length
			PlotsOfDifferences - Plots all Of the Data and Differences
Tract	NL			Condition	n	mean	sd	sem	median	MAD	95CI median
203.382	32.7817		1	NL	52	55.38	21.91	3.07	52.45	14.04	44.45 - 60.84
165.794	47.0415		2	Tract	47	181.26	47.7	7.03	194.37	28.57	171.42 - 202.29
194.365	66.319
173.707	39.9762
276.142	53.6624		PlotsOfDifferences - Plots all Of the Data and Differences
125.006	110.038			Condition	difference	CI_lo	CI_hi	p_median
121.773	55.3705		1	NL	-138.164	-153.171	-115.766	<0.001
201.045	42.7643		2	Tract				1
106.334	67.0659
242.869	40.3959
99.9512	33.7721
109.581	24.5799
259.648	74.1148
171.418	44.1797
220.082	35.224
228.258	110.586
191.41	108.906
201.366	79.8855
197.579	34.7946
132.7	63.1654
199.071	80.7542
164.172	65.7054
209.351	66.654		Shapiro-Wilk normality test
184.545	31.6197			Tract	W = 0.95392, p-value = 0.06175
166.63	58.4479			NL	W = 0.93141, p-value = 0.005093
205.066	32.1441
179.482	27.978		Wilcoxon rank sum test with continuity correction
163.737	66.1174			W = 2423, p-value < 2.2e-16
95.8602	49.7857
142.499	97.8806
105.319	37.8933
173.916	48.5129
201.394	30.5546
205.679	62.1459
225.431	74.6283
213.91	39.9184
202.292	70.8029
216.767	44.4519
227.696	49.8825
215.951	41.1589
256.966	56.2017
254.154	55.5223
194.521	47.2352
162.563	63.8737
105.609	73.4032
99.454	55.5998
124.793	91.4953
	35.9305
	51.8333
	22.1509
	31.6295
	53.0651

## Sheet: Figure 3F
Myelin diameter
			PlotsOfDifferences - Plots all Of the Data and Differences
Tract	NL			Condition	n	mean	sd	sem	median	MAD	95CI median
2.03	2.62		1	NL	52	1.64	0.5	0.07	1.54	0.39	1.5 - 1.72
1.98	1.12		2	Tract	47	1.69	0.35	0.05	1.67	0.29	1.53 - 1.76
2.3	2.21
1.54	1.31
1.55	1.18		PlotsOfDifferences - Plots all Of the Data and Differences
0.88	1.09			Condition	difference	CI_lo	CI_hi	p_median
1.16	1.33		1	NL	-0.104	-0.24	0.12	0.347
1.31	2.43		2	Tract				1
1.33	0.88
1.71	0.86
1.52	1.52
1.68	2.81
1.59	1.52
1.37	2.18
1.35	2.35
1.66	2.39
1.93	1.29
1.53	1.99
2.14	2.37
1.45	2.18
1.99	2.17
1.69	1.71
2.41	1.08		Shapiro-Wilk normality test
1.67	1.54			Tract	W = 0.97294, p-value = 0.3413
1.59	1.32			NL	W = 0.97121, p-value = 0.2376
2.18	1.52
1.33	1.15		Levene's test
1.38	1.1			0.04039
1.54	2.2
1.16	2.18		two-tailed Welch's t-test
1.34	1.98			t = 0.60143, df = 91.605, p-value = 0.549
2.16	1.63
1.78	1.11
2.24	1.54
2.14	0.64
1.52	1.54
1.96	1.01
2.15	1.5
1.76	1.96
1.73	1.93
2.14	1.99
1.33	1.93
1.31	1.15
1.91	1.5
1.75	1.16
1.95	1.49
1.52	1.52
	1.51
	1.73
	1.54
	1.59
	1.88

## Sheet: Figure 3G
Myelin length vs. Myelin diameter
Area	Length	Diameter
Tract	203.382	2.03
Tract	165.794	1.98		Spearman’s rank correlation coefficient
Tract	194.365	2.3			Tract	r=0.32	p=0.025
Tract	173.707	1.54			NL	r=-0.12	p=0.41
Tract	276.142	1.55
Tract	125.006	0.88
Tract	121.773	1.16
Tract	201.045	1.31
Tract	106.334	1.33
Tract	242.869	1.71
Tract	99.9512	1.52
Tract	109.581	1.68
Tract	259.648	1.59
Tract	171.418	1.37
Tract	220.082	1.35
Tract	228.258	1.66
Tract	191.41	1.93
Tract	201.366	1.53
Tract	197.579	2.14
Tract	132.7	1.45
Tract	199.071	1.99
Tract	164.172	1.69
Tract	209.351	2.41
Tract	184.545	1.67
Tract	166.63	1.59
Tract	205.066	2.18
Tract	179.482	1.33
Tract	163.737	1.38
Tract	95.8602	1.54
Tract	142.499	1.16
Tract	105.319	1.34
Tract	173.916	2.16
Tract	201.394	1.78
Tract	205.679	2.24
Tract	225.431	2.14
Tract	213.91	1.52
Tract	202.292	1.96
Tract	216.767	2.15
Tract	227.696	1.76
Tract	215.951	1.73
Tract	256.966	2.14
Tract	254.154	1.33
Tract	194.521	1.31
Tract	162.563	1.91
Tract	105.609	1.75
Tract	99.454	1.95
Tract	124.793	1.52
NL	32.7817	2.62
NL	47.0415	1.12
NL	66.319	2.21
NL	39.9762	1.31
NL	53.6624	1.18
NL	110.038	1.09
NL	55.3705	1.33
NL	42.7643	2.43
NL	67.0659	0.88
NL	40.3959	0.86
NL	33.7721	1.52
NL	24.5799	2.81
NL	74.1148	1.52
NL	44.1797	2.18
NL	35.224	2.35
NL	110.586	2.39
NL	108.906	1.29
NL	79.8855	1.99
NL	34.7946	2.37
NL	63.1654	2.18
NL	80.7542	2.17
NL	65.7054	1.71
NL	66.654	1.08
NL	31.6197	1.54
NL	58.4479	1.32
NL	32.1441	1.52
NL	27.978	1.15
NL	66.1174	1.1
NL	49.7857	2.2
NL	97.8806	2.18
NL	37.8933	1.98
NL	48.5129	1.63
NL	30.5546	1.11
NL	62.1459	1.54
NL	74.6283	0.64
NL	39.9184	1.54
NL	70.8029	1.01
NL	44.4519	1.5
NL	49.8825	1.96
NL	41.1589	1.93
NL	56.2017	1.99
NL	55.5223	1.93
NL	47.2352	1.15
NL	63.8737	1.5
NL	73.4032	1.16
NL	55.5998	1.49
NL	91.4953	1.52
NL	35.9305	1.51
NL	51.8333	1.73
NL	22.1509	1.54
NL	31.6295	1.59
NL	53.0651	1.88

## Sheet: Figure 3H
Myelin #/cell
			PlotsOfDifferences - Plots all Of the Data and Differences
Tract	NL			Condition	n	mean	sd	sem	median	MAD	95CI median
4	8		1	NL	18	6.61	2.43	0.59	7	1.5	4.99 - 8
3	8		2	Tract	31	3.03	0.95	0.17	3	1	3 - 4
4	8
2	7		PlotsOfDifferences - Plots all Of the Data and Differences
5	9			Condition	difference	CI_lo	CI_hi	p_median
3	8		1	NL	3.842	1.5	5	<0.001
4	7		2	Tract				1
3	8
3	12
4	9
2	4
3	5
2	6
3	3
3	3
4	6
2	4
2	4
2
2
4
4			Shapiro-Wilk normality test
3				Tract	W = 0.89034, p-value = 0.004172
4				NL	W = 0.93763, p-value = 0.2638
3
3			Wilcoxon rank sum test with continuity correction
2				W = 50.5, p-value = 1.384e-06
2
4
1
4

## Sheet: Figure 3I
Total myelin length/cell (um)
			PlotsOfDifferences - Plots all Of the Data and Differences
Tract	NL			Condition	n	mean	sd	sem	median	MAD	95CI median
532.618	398.452		1	NL	18	394.64	122.5	29.71	377.59	95.09	302.19 - 480.57
500.221	462.337		2	Tract	31	527.9	149.19	27.24	492.42	88.66	445.83 - 655.23
487.554	431.73
460.838	341.704		PlotsOfDifferences - Plots all Of the Data and Differences
720.08	543.274			Condition	difference	CI_lo	CI_hi	p_median
629.581	436.855		1	NL	-119.001	-218.848	-11.241	0.007
762.243	524.127		2	Tract				1
640.519	272.152
390.806	633.489
737.247	504.769
477.187	356.727
619.758	538.48
330.279	262.446
564.609	305.493
560.527	184.21
433.962	349.819
375.309	298.896
431.11	258.6
416.202
444.463
921.592
492.42			Shapiro-Wilk normality test
459.124				Tract	W = 0.97767, p-value = 0.7453
549.519				NL	W = 0.97125, p-value = 0.8208
403.758
713.697			Levene's test
487.493				0.6399
346.392
670.359			two-tailed Student's t-test
212.494				t = 3.2091, df = 47, p-value = 0.0024
592.941

## Sheet: Figure 3J
Average myelin length/cell (um)
			PlotsOfDifferences - Plots all Of the Data and Differences
Tract	NL			Condition	n	mean	sd	sem	median	MAD	95CI median
133.155	49.8065		1	NL	18	63.59	19.43	4.71	58.05	7.42	53.38 - 69.69
166.74	57.7921		2	Tract	31	181.09	39.88	7.28	186.84	33.8	128.52 - 144.98
121.888	53.9662
230.419	48.8149		PlotsOfDifferences - Plots all Of the Data and Differences
144.016	60.3638			Condition	difference	CI_lo	CI_hi	p_median
209.86	54.6069		1	NL	-125.813	-151.248	-103.509	<0.001
190.561	74.8753		2	Tract				1
213.506	34.019
130.269	52.7907
184.312	56.0855
238.594	89.1818
206.586	107.696
165.139	43.741
188.203	101.831
186.842	61.4032
108.49	58.3031
187.655	74.7239
215.555	64.6499
208.101
222.232
230.398
123.105			Shapiro-Wilk normality test
153.041				Tract	W = 0.95101, p-value = 0.1665
137.38				NL	W = 0.89634, p-value = 0.04962
134.586
237.899			Wilcoxon rank sum test with continuity correction
243.746				W = 558, p-value = 1.731e-13
173.196
167.59
212.494
148.235

## Sheet: Figure 3K
cell body size			PlotsOfDifferences - Plots all Of the Data and Differences
				Condition	n	mean	sd	sem	median	IQR	95CI median
Tract	NL		1	NL	65	52.45	15.25	1.91	50.04	21.59	45.35 - 54.73
110.785	75.1076		2	Tract	38	78.18	16.48	2.71	75.58	22.73	71.49 - 80.55
115.621	75.1076
54.1253	45.1585		PlotsOfDifferences - Plots all Of the Data and Differences
51.2617	60.6963			Condition	difference	CI_lo	CI_hi	p_median		Ftest	Ttest
63.9364	58.537		1	NL	-25.622	-32.39	-18.703	<0.001		0.577435	1.95148e-12
62.8097	53.9367		2	Tract				1
62.1056	66.2825
76.0007	76.6098
63.4669	56.8471
78.3009	101.161
59.9931	74.1688
64.265	79.7549
73.3719	80.6937
105.622	44.1727
88.5345	54.7347
70.7431	40.9818
97.3598	50.0419
81.3991	50.0888
80.5542	40.4185
74.5455	38.306
85.9526	49.5255
71.0247	25.819		Shapiro-Wilk normality test
55.4397	45.0659			Tract	W = 0.96092, p-value = 0.2034
84.1688	36.3344			NL	W = 0.95801, p-value = 0.02705
78.5826	38.5877
94.8248	37.3202		Wilcoxon rank sum test with continuity correction
99.5171	31.1706			W = 2167, p-value = 1.932e-10
79.6606	37.3202
75.5766	44.0331
71.9621	35.3955
67.8312	34.5036
56.1433	42.7187
75.5775	59.5715
107.686	30.4195
94.3545	34.0341
71.6812	46.8028
93.8381	45.9109
72.1507	38.8224
	66.0966
	48.9622
	33.1891
	59.8531
	63.4208
	53.3749
	50.4644
	49.103
	51.9666
	39.7143
	58.3979
	39.7612
	38.2591
	62.8106
	43.1412
	51.591
	48.6805
	54.0321
	38.6346
	82.9494
	55.769
	61.3553
	45.3475
	68.9132
	69.2418
	71.6829
	66.1905

## Sheet: Figure 3L
Myelin #/cell vs. Total myelin length / cell
Area	Myelin # / cell	Total myelin length / cell
Tract	4	532.618
Tract	3	500.221		Spearman’s rank correlation coefficient
Tract	4	487.554			Tract	r=0.68	p=2.3E-05
Tract	2	460.838			NL	r=0.72	p=7.7E-04
Tract	5	720.08
Tract	3	629.581
Tract	4	762.243
Tract	3	640.519
Tract	3	390.806
Tract	4	737.247
Tract	2	477.187
Tract	3	619.758
Tract	2	330.279
Tract	3	564.609
Tract	3	560.527
Tract	4	433.962
Tract	2	375.309
Tract	2	431.11
Tract	2	416.202
Tract	2	444.463
Tract	4	921.592
Tract	4	492.42
Tract	3	459.124
Tract	4	549.519
Tract	3	403.758
Tract	3	713.697
Tract	2	487.493
Tract	2	346.392
Tract	4	670.359
Tract	1	212.494
Tract	4	592.941
NL	8	398.452
NL	8	462.337
NL	8	431.73
NL	7	341.704
NL	9	543.274
NL	8	436.855
NL	7	524.127
NL	8	272.152
NL	12	633.489
NL	9	504.769
NL	4	356.727
NL	5	538.48
NL	6	262.446
NL	3	305.493
NL	3	184.21
NL	6	349.819
NL	4	298.896
NL	4	258.6

## Sheet: Figure 3M
Myelin #/cell vs. Average myelin length / cell
Area	Myelin # / cell	Average myelin length / cell
Tract	4	133.155
Tract	3	166.74		Spearman’s rank correlation coefficient
Tract	4	121.888			Tract	r=-0.58	p=6.3E-04
Tract	2	230.419			NL	r=-0.58	p=0.012
Tract	5	144.016
Tract	3	209.86
Tract	4	190.561
Tract	3	213.506
Tract	3	130.269
Tract	4	184.312
Tract	2	238.594
Tract	3	206.586
Tract	2	165.139
Tract	3	188.203
Tract	3	186.842
Tract	4	108.49
Tract	2	187.655
Tract	2	215.555
Tract	2	208.101
Tract	2	222.232
Tract	4	230.398
Tract	4	123.105
Tract	3	153.041
Tract	4	137.38
Tract	3	134.586
Tract	3	237.899
Tract	2	243.746
Tract	2	173.196
Tract	4	167.59
Tract	1	212.494
Tract	4	148.235
NL	8	49.8065
NL	8	57.7921
NL	8	53.9662
NL	7	48.8149
NL	9	60.3638
NL	8	54.6069
NL	7	74.8753
NL	8	34.019
NL	12	52.7907
NL	9	56.0855
NL	4	89.1818
NL	5	107.696
NL	6	43.741
NL	3	101.831
NL	3	61.4032
NL	6	58.3031
NL	4	74.7239
NL	4	64.6499
