# Supplementary material for: Regional heterogeneities of oligodendrocytes underlie biased Ranvier node spacing along single axons in sound localization circuit
Source: eLife. 2025 Dec 23;14:RP106415. doi: 10.7554/eLife.106415 (PMC12726825; doi:10.7554/eLife.106415)
Supplement: Figure 4—source data 1. [file elife-106415-fig4-data1.xlsx]

## Sheet: Figure 4E-I
Branch point interval vs. internode # between branch points									Internodal length vs. branch point interval
Branch point interval (um)	internode # between primary branch points		0	1	2	3≦			Internodal length	internode # between primary branch points	Branch point interval (um)
58.0742	1		27.7343	58.0742	180.947	330.493			43.5709	5	330.493
77.5148	1		13.6233	77.5148	160.393	216.893			43.1834	5	330.493
64.7469	1		43.5305	64.7469	222.136	284.382			72.4455	5	330.493
240.98	3		20.407	36.8189	164.301	303.327			68.2853	5	330.493
36.8189	1		29.2355	67.2772	147.652	240.98			98.126	5	330.493
67.2772	1		29.4951	122.455	90.0967	225.832			99.729	4	216.893
122.455	1		16.9202	85.4792	162.64	225.164			26.014	4	216.893
225.832	3		46.4944	108.827	200.562	201.179			45.5865	4	216.893
180.947	2		13.1743	91.2645	235.27	194.886			39.1821	4	216.893
160.393	2		34.0599	83.3697	191.069	222.393			69.538	4	303.327
85.4792	1			56.4597	114.098	198.392			64.6444	4	303.327
108.827	1			12.4484	103.793	209.6			91.2323	4	303.327
222.136	2			85.3731	178.228	257.7			109.428	4	284.382
164.301	2			84.1458	90.2153	193.568			51.349	4	284.382
91.2645	1			72.6421	140.164	203.111			98.9225	4	284.382
147.652	2			62.779	148.341	228.354			78.3177	3	240.98
83.3697	1			74.826	157.103	207.495			84.2368	3	240.98
56.4597	1			68.6198	143.29	155.815			79.206	3	240.98
12.4484	1			154.042	117.555				89.8637	3	225.832
216.893	4			186.932	141.937				36.8999	3	225.832
90.0967	2			142.311	227.424				89.1362	3	225.832
162.64	2			133.83	192.543				53.7577	3	225.164
85.3731	1			67.3939	217.567				69.6555	3	225.164
84.1458	1			140.266	164.716				98.2317	3	225.164
72.6421	1			107.618	123.327				64.2449	3	201.179
200.562	2			97.6738	145.627				77.5227	3	201.179
62.779	1			77.2748	137.035				54.6698	3	201.179
74.826	1			53.5215	103.538				55.1484	3	194.886
27.7343	0			42.9475	217.133				72.733	3	194.886
235.27	2			51.1353	161.522				63.7868	3	194.886
68.6198	1			148.591	162.163				67.3034	3	222.393
191.069	2			66.1383	92.7946				54.1775	3	222.393
154.042	1			29.7329	213.725				65.9534	3	222.393
186.932	1			106.126	109.742				106.384	3	198.392
142.311	1			99.7663	106.459				129.938	3	198.392
133.83	1			101.947	161.95				65.4597	3	198.392
225.164	3			48.786					55.6213	3	209.6
201.179	3			39.4772					77.3892	3	209.6
67.3939	1			62.6939					69.4865	3	209.6
140.266	1			104.809					94.1992	3	257.7
107.618	1			42.9728					88.1153	3	257.7
114.098	2			81.8547					67.4434	3	257.7
103.793	2			53.159					87.0881	3	193.568
178.228	2			69.5997					43.0709	3	193.568
194.886	3			47.3027					61.4532	3	193.568
97.6738	1			36.9203					79.6673	3	203.111
90.2153	2			105.806					48.7953	3	203.111
13.6233	0			55.0259					69.351	3	203.111
77.2748	1			44.2001					93.0617	3	228.354
53.5215	1			54.7401					50.8439	3	228.354
42.9475	1								73.3686	3	228.354
43.5305	0								81.9032	3	207.495
51.1353	1								61.2533	3	207.495
148.591	1								57.5283	3	207.495
20.407	0								39.1579	3	155.815
140.164	2								53.2184	3	155.815
29.2355	0								60.9484	3	155.815
148.341	2								93.0906	2	180.947
330.493	5								84.6543	2	180.947
222.393	3								72.2782	2	160.393
29.4951	0								86.0738	2	160.393
157.103	2								115.484	2	222.136
143.29	2								104.461	2	222.136
66.1383	1								18.779	2	164.301
284.382	4								138.536	2	164.301
303.327	4								57.6658	2	147.652
117.555	2								87.6942	2	147.652
141.937	2								31.2615	2	90.0967
227.424	2								57.123	2	90.0967
29.7329	1								91.704	2	162.64
192.543	2								66.9286	2	162.64
106.126	1								93.6437	2	200.562
99.7663	1								94.3203	2	200.562
101.947	1								80.4719	2	235.27
16.9202	0								125.53	2	235.27
217.567	2								90.8045	2	191.069
48.786	1								94.6494	2	191.069
39.4772	1								72.8419	2	114.098
164.716	2								39.1981	2	114.098
198.392	3								48.1159	2	103.793
62.6939	1								53.8515	2	103.793
104.809	1								61.3707	2	178.228
209.6	3								87.0875	2	178.228
123.327	2								59.6458	2	90.2153
257.7	3								26.6478	2	90.2153
145.627	2								63.7589	2	140.164
42.9728	1								72.1369	2	140.164
46.4944	0								58.3414	2	148.341
81.8547	1								90.0389	2	148.341
137.035	2								84.57	2	157.103
53.159	1								68.3345	2	157.103
193.568	3								41.9656	2	143.29
103.538	2								76.2536	2	143.29
217.133	2								65.4733	2	117.555
13.1743	0								49.2736	2	117.555
69.5997	1								82.813	2	141.937
203.111	3								46.9959	2	141.937
47.3027	1								101.168	2	227.424
161.522	2								125.412	2	227.424
162.163	2								122.643	2	192.543
92.7946	2								66.9492	2	192.543
34.0599	0								97.9861	2	217.567
36.9203	1								63.9769	2	217.567
213.725	2								77.1799	2	164.716
105.806	1								83.3263	2	164.716
55.0259	1								51.4019	2	123.327
44.2001	1								68.0333	2	123.327
109.742	2								59.5932	2	145.627
54.7401	1								62.2104	2	145.627
228.354	3								68.5943	2	137.035
106.459	2								63.0413	2	137.035
207.495	3								28.8187	2	103.538
155.815	3								45.9783	2	103.538
161.95	2								121.731	2	217.133
									91.4308	2	217.133
									86.6044	2	161.522
									70.2754	2	161.522
									82.4651	2	162.163
									74.4266	2	162.163
									43.1054	2	92.7946
									45.8788	2	92.7946
									116.643	2	213.725
									92.5577	2	213.725
									55.8822	2	109.742
									50.4285	2	109.742
									63.1256	2	106.459
									39.433	2	106.459
									73.8572	2	161.95
									61.5005	2	161.95
									58.0742	1	58.0742
									77.5148	1	77.5148
									61.3558	1	64.7469
									34.235	1	36.8189
									68.0561	1	67.2772
									119.529	1	122.455
									84.1939	1	85.4792
									107.221	1	108.827
									90.0577	1	91.2645
									79.481	1	83.3697
									56.2271	1	56.4597
									10.8912	1	12.4484
									84.5882	1	85.3731
									81.1135	1	84.1458
									73.4031	1	72.6421
									61.6962	1	62.779
									73.428	1	74.826
									65.9597	1	68.6198
									185.523	1	186.932
									152.063	1	154.042
									131.814	1	133.83
									140.648	1	142.311
									67.796	1	67.3939
									140.162	1	140.266
									103.838	1	107.618
									96.4868	1	97.6738
									78.2232	1	77.2748
									54.2307	1	53.5215
									42.0063	1	42.9475
									50.7117	1	51.1353
									103.078	1	148.591
									64.1442	1	66.1383
									28.3315	1	29.7329
									106.366	1	106.126
									99.2026	1	99.7663
									100.816	1	101.947
									47.7124	1	48.786
									38.9112	1	39.4772
									63.8517	1	62.6939
									41.0971	1	42.9728
									77.2513	1	81.8547
									51.0117	1	53.159
									66.3092	1	69.5997
									19.7401	1	47.3027
									36.0093	1	36.9203
									105.048	1	105.806
									53.5523	1	55.0259
									51.8516	1	54.7401
									43.0397	1	44.2001
									0	0	27.7343
									0	0	13.6233
									0	0	43.5305
									0	0	20.407
									0	0	29.2355
									0	0	29.4951
									0	0	16.9202
									0	0	46.4944
									0	0	13.1743
									0	0	34.0599

## Sheet: Figure 4J
Internodal length
				PlotsOfDifferences - Plots all Of the Data and Differences
branch point interval at NL: <220	branch point interval at NL: 220< (top 10%)	Tract
97.9861	43.5709	149.782			Condition	n	mean	sd	sem	median	MAD	95CI median
63.9769	43.1834	159.37		1	220< (top 10%)	35	79.91	22.92	3.93	79.21	14.56	63.74 - 72.84
121.731	72.4455	153.864		2	<220	143	71.41	28.01	2.35	66.95	16.38	69.51 - 91.23
91.4308	68.2853	144.351		3	Tract	132	164.31	47.47	4.15	166.97	30.39	158.02 - 182.09
99.729	98.126	77.1657
26.014	69.538	120.724		PlotsOfDifferences - Plots all Of the Data and Differences
45.5865	64.6444	130.07			Condition	difference	CI_lo	CI_hi	p_median
39.1821	91.2323	205.098		1	220< (top 10%)	-89.255	-108.535	-70.633	<0.001
116.643	109.428	165.411		2	<220	-101.883	-117.393	-89.91	<0.001
92.5577	51.349	143.679		3	Tract				1
55.6213	98.9225	152.981
77.3892	94.1992	77.1377
69.4865	88.1153	130.453
81.9032	67.4434	127.138
61.2533	78.3177	180.938
57.5283	84.2368	185.877
79.6673	79.206	97.2626
48.7953	80.4719	165.894
69.351	125.53	226.132
64.2449	93.0617	196.612
77.5227	50.8439	125.1
54.6698	73.3686	195.767
93.6437	101.168	181.783
94.3203	125.412	186.878
106.384	89.8637	115.237
129.938	36.8999	160.17
65.4597	89.1362	151.32
55.1484	53.7577	111.564
72.733	69.6555	125.65		Shapiro-Wilk normality test
63.7868	98.2317	92.8564			<220	W = 0.95848, p-value = 0.0002609
87.0881	67.3034	126.902			220< (top 10%)	W = 0.97987, p-value = 0.755
43.0709	54.1775	167.045			Tract	W = 0.98397, p-value = 0.1236
61.4532	65.9534	198.655
122.643	115.484	136.079		Kruskal-Wallis test
66.9492	104.461	209.852			p-value < 2.2e-16
90.8045		190.89
94.6494		158.315		post hoc Steel-Dwass test
185.523		96.641				t p
93.0906		138.438			<220 vs. 220< (top 10%)	1:2 2.196083 7.182599e-02
84.6543		262.857			<220 vs. Tract	1:3 12.632300 0.000000e+00
61.3707		220.123			220< (top 10%) vs. Tract	2:3 7.856163 5.639933e-14
87.0875		118.606
77.1799		171.966
83.3263		176.489
18.779		88.9699
138.536		181.637
91.704		161.557
66.9286		162.344
82.4651		195.39
74.4266		213.611
73.8572		80.8015
61.5005		111.446
86.6044		140.265
70.2754		120.359
72.2782		163.991
86.0738		157.672
84.57		144.915
68.3345		218.57
39.1579		182.002
53.2184		186.061
60.9484		66.689
152.063		144.284
103.078		168.386
58.3414		94.3539
90.0389		257.892
57.6658		186.567
87.6942		211.377
59.5932		219.238
62.2104		166.431
41.9656		134.42
76.2536		197.452
140.648		78.2589
82.813		191.585
46.9959		115.76
140.162		224.913
63.7589		146.919
72.1369		203.719
68.5943		209.261
63.0413		163.563
131.814		118.097
51.4019		195.311
68.0333		185.818
119.529		172.63
65.4733		157.738
49.2736		178.614
72.8419		203.592
39.1981		143.395
55.8822		186.189
50.4285		197.285
107.221		233.201
103.838		174.236
63.1256		195.949
39.433		156.01
106.366		227.721
105.048		158.383
48.1159		194.697
53.8515		244.074
28.8187		203.39
45.9783		147.89
100.816		211.79
99.2026		196.86
96.4868		93.5028
43.1054		151.58
45.8788		213.706
90.0577		43.803
59.6458		203.567
26.6478		53.6633
31.2615		27.8448
57.123		197.351
84.1939		183.764
84.5882		228.932
81.1135		191.142
79.481		208.526
77.2513		189.559
77.5148		81.3932
78.2232		128.294
73.428		202.49
73.4031		224.028
66.3092		190.465
65.9597		205.352
67.796		149.443
68.0561		292.871
64.1442		192.838
61.3558		189.949
61.6962		166.888
63.8517		117.291
58.0742		239.645
56.2271		127.867
53.5523		182.088
51.8516		85.3338
54.2307		145.837
51.0117		197.356
50.7117
47.7124
19.7401
43.0397
41.0971
42.0063
38.9112
36.0093
34.235
28.3315
10.8912

## Sheet: Figure 4K
Axon diameter
				PlotsOfDifferences - Plots all Of the Data and Differences
Tract (contra)	NL Stem axon				Condition	n	mean	sd	sem	median	MAD	95CI median
0.77	1.96			1	NL Stem axon	81	1.47	0.39	0.04	1.44	0.26	1.29 - 1.56
0.66	1.68			2	Tract (contra)	114	1.4	0.36	0.03	1.32	0.26	1.28 - 1.45
1.42	0.9
1.57	1.45
1.16	2.58			PlotsOfDifferences - Plots all Of the Data and Differences
1.55	2.59				Condition	difference	CI_lo	CI_hi	p_median
1.17	1.29			1	NL Stem axon	0.077	-0.115	0.24	0.344
1.43	1.8			2	Tract (contra)				1
1.31	1.55
1.56	1.93
1.06	1.88
1.69	1.99
1.97	0.96
0.92	1.29
0.91	1.03
0.78	1.18
1.3	1.98
1.8	1.18
1.3	1.59
1.27	1.32
1.95	1.31
1.6	2.09
1.59	1.3
1.06	1.84
1.46	1.51			Shapiro-Wilk normality test
2	1.44				Tract	W = 0.96833, p-value = 0.00836
1.06	1.06				NL	W = 0.95807, p-value = 0.009632
2.2	1.69
1.82	2.32			Wilcoxon rank sum test with continuity correction
1.84	1.2				W = 4221.5, p-value = 0.309
1.44	1.19
1.71	1.43
1.55	1.44
1.32	2.08
1.33	1.56
1.36	1.95
1.57	1.16
1.07	1.36
1.06	1.56
1.61	1.8
0.92	0.79
1.56	1.67
1.96	1.15
2.11	1.07
1.24	1.17
0.91	1.44
1.44	1.19
1.28	1.2
1.92	1.06
1.19	0.91
1.45	1.08
1.18	1.04
1.32	1.18
1.22	1.57
1.7	0.9
1.54	1.58
1.28	1.16
1.4	1.8
1.29	1.29
1.14	1.68
1.16	1.95
1.31	1.1
1.47	1.19
2.01	1.6
1.95	1.43
1.43	1.7
2.27	1.03
1.08	1.71
1.04	1.04
1.31	1.42
1.03	1.71
1.16	1.83
1.05	1.46
1.18	2.22
1.43	1.03
1.92	1.29
1.6	1.32
1.62	1.67
1.19	1.49
1.19	1.18
1.45	1.51
1.7
2.08
2.11
1.04
1.2
0.91
1.69
1.31
1.56
1.19
0.87
1.61
0.92
1.56
1.06
1.05
2.02
1.85
1.2
1.18
1.57
1.58
1.17
1.15
1.95
1.96
1.3
0.98
1.04
1.04
1.17
0.93
1.96
