# Supplementary material for: Regional heterogeneities of oligodendrocytes underlie biased Ranvier node spacing along single axons in sound localization circuit
Source: eLife. 2025 Dec 23;14:RP106415. doi: 10.7554/eLife.106415 (PMC12726825; doi:10.7554/eLife.106415)
Supplement: Figure 5—source data 1. [file elife-106415-fig5-data1.xlsx]

## Sheet: Figure 5B
Olig2+ cell density
E9 Tract	E9 NL		Shapiro-Wilk normality test					Levene's test			Two-tailed paired t-test
0.568828	0.568899			E9 Tract	W = 0.97074, p-value = 0.6717				0.6671			t = 0.20353, df = 2, p-value = 0.8575
0.41543	0.203625			E9 NL	W = 0.91777, p-value = 0.4446
0.332963	0.480947
E12 Tract	E12 NL		Shapiro-Wilk normality test					Levene's test			Two-tailed paired t-test
1.08103	1.46843			E12 Tract	W = 0.91665, p-value = 0.5183				0.9105			t = -7.3191, df = 3, p-value = 0.005268
1.58089	2.12579			E12 NL	W = 0.92933, p-value = 0.5905
1.76941	2.14286
1.90796	2.56104
E15 Tract	E15 NL		Shapiro-Wilk normality test					Levene's test			Two-tailed paired t-test
2.26655	3.1437			E15 Tract	W = 0.99114, p-value = 0.9633				0.6			t = -3.3766, df = 3, p-value = 0.0432
1.54182	2.16609			E15 NL	W = 0.72785, p-value = 0.2342
1.98216	3.20559
2.88149	3.07766
E18 Tract	E18 NL		Shapiro-Wilk normality test					Levene's test			Two-tailed paired t-test
2.72758	2.84258			E18 Tract	W = 0.95284, p-value = 0.7632				0.559			t = -4.4562, df = 5, p-value = 0.006664
1.22324	1.7462			E18 NL	W = 0.87643, p-value = 0.2531
1.57223	2.15925
1.54845	1.97195
1.95509	2.94171
2.11306	3.05026
E21 Tract	E21 NL		Shapiro-Wilk normality test					Levene's test			Two-tailed paired t-test
1.96614	2.58385			E21 Tract	W = 0.94133, p-value = 0.5328				0.8956			t = -12.325, df = 2, p-value = 0.006518
1.52822	2.25494			E21 NL	W = 0.84958, p-value = 0.2393
1.6525	2.20334
E9 NL/Tract	E12 NL/Tract	E15 NL/Tract	E18 NL/Tract	E21 NL/Tract
1.00012	1.35836	1.387	1.04216	1.31417
0.490153	1.34468	1.40489	1.42752	1.47553
1.44444	1.21106	1.61722	1.37337	1.33333
	1.34229	1.06808	1.27351
			1.50464
			1.44353

## Sheet: Figure 5C
Nkx2.2+ cell density
E9 Tract	E9 NL		Shapiro-Wilk normality test					Levene's test			Two-tailed paired t-test
0.278035	0.0989389			E9 Tract	W = 0.92338, p-value = 0.4644				0.8534			t = 2.2158, df = 2, p-value = 0.1571
0.148368	0.13575			E9 NL	W = 0.81534, p-value = 0.1517
0.665927	0.517943
E12 Tract	E12 NL		Shapiro-Wilk normality test					Levene's test			Two-tailed paired t-test
0.778354	1.12956			E12 Tract	W = 0.93225, p-value = 0.6077				0.293			t = -4.7165, df = 3, p-value = 0.01805
1.49306	1.90588			E12 NL	W = 0.85684, p-value = 0.2491
0.929689	1.23214
1.06846	1.79273
E15 Tract	E15 NL		Shapiro-Wilk normality test					Levene's test			Two-tailed paired t-test
1.61491	2.08318			E15 Tract	W = 0.83668, p-value = 0.1859				0.4177			t = -4.6483, df = 3, p-value = 0.01878
1.07543	1.58416			E15 NL	W = 0.79347, p-value = 0.09101
1.04826	1.53103
1.50187	1.6452
E18 Tract	E18 NL		Shapiro-Wilk normality test					Levene's test			Two-tailed paired t-test
1.32117	1.39873			E18 Tract	W = 0.96291, p-value = 0.8419				0.8433			t = -6.6053, df = 5, p-value = 0.001196
0.960592	1.20391			E18 NL	W = 0.97998, p-value = 0.9514
1.3952	1.74707
1.12718	1.40854
1.17306	1.48086
1.28526	1.59445
E21 Tract	E21 NL		Shapiro-Wilk normality test					Levene's test			Two-tailed paired t-test
1.3747	1.83526			E21 Tract	W = 0.89522, p-value = 0.3705				0.4342			t = -5.0182, df = 2, p-value = 0.03749
1.19327	1.44656			E21 NL	W = 0.99325, p-value = 0.8429
1.33774	1.61316
E9 NL/Tract	E12 NL/Tract	E15 NL/Tract	E18 NL/Tract	E21 NL/Tract
0.35585	1.45122	1.28996	1.0587	1.33502
0.914953	1.27649	1.47304	1.25331	1.21227
0.777778	1.32533	1.46054	1.2522	1.20588
	1.67786	1.09544	1.24962
			1.26239
			1.24057

## Sheet: Figure 5E
BrdU+ cell density
E10 Tract	E10 NL		Shapiro-Wilk normality test					Levene's test			Two-tailed paired t-test
0.608557	0.716375			E10 Tract	W = 0.95634, p-value = 0.598				0.3277			t = -2.4162, df = 2, p-value = 0.137
0.666286	0.776372			E10 NL	W = 0.90597, p-value = 0.4048
0.648104	0.987846
E12 Tract	E12 NL		Shapiro-Wilk normality test					Levene's test			Two-tailed paired t-test
0.655666	1.0037			E12 Tract	W = 0.76242, p-value = 0.2762				0.258			t = -5.258, df = 2, p-value = 0.03432
0.606673	1.25895			E12 NL	W = 0.96286, p-value = 0.6296
0.656491	1.08791
E14 Tract	E14 NL		Shapiro-Wilk normality test					Levene's test			Two-tailed paired t-test
0.428252	0.953256			E14 Tract	W = 0.87982, p-value = 0.3239				0.6803			t = -5.6833, df = 2, p-value = 0.02959
0.547831	0.828215			E14 NL	W = 0.95524, p-value = 0.5928
0.526316	1.0101
E16 Tract	E16 NL		Shapiro-Wilk normality test					Levene's test			Two-tailed paired t-test
0.370683	0.720486			E16 Tract	W = 0.9998, p-value = 0.9727				0.7275			t = -4.6661, df = 2, p-value = 0.04299
0.46998	0.629756			E16 NL	W = 0.97079, p-value = 0.672
0.56448	0.889142
E18 Tract	E18 NL		Shapiro-Wilk normality test					Levene's test			Two-tailed paired t-test
0.193155	0.259658			E18 Tract	W = 0.96291, p-value = 0.6299				0.687			t = -3.7764, df = 2, p-value = 0.06351
0.256989	0.415225			E18 NL	W = 0.79277, p-value = 0.09735
0.161708	0.250215
E20 Tract	E20 NL		Shapiro-Wilk normality test					Levene's test			Two-tailed paired t-test
0.0342683	0.0361193			E20 Tract	W = 0.99153, p-value = 0.824				0.9894			t = -1.7447, df = 2, p-value = 0.2232
0.0610575	0.0625613			E20 NL	W = 0.86912, p-value = 0.293
0.0498074	0.0582264
E10 NL/Tract	E12 NL/Tract	E14 NL/Tract	E16 NL/Tract	E18 NL/Tract	E20 NL/Tract
1.17717	1.53081	2.22592	1.94367	1.3443	1.05402
1.16522	2.07516	1.51181	1.33996	1.61573	1.02463
1.52421	1.65716	1.91919	1.57515	1.54733	1.16903

## Sheet: Figure 5G
BrdU vs. Nkx2.2 or Olig2
brdu/nkx	brdu/olig		Shapiro-Wilk normality test					Wilcoxon rank sum test with continuity correction
0.474138	0.323529			brdu/nkx	W = 0.943, p-value = 0.6727				W = 16, p-value = 0.02857
0.532468	0.26087			brdu/olig	W = 0.88652, p-value = 0.3672
0.569444	0.2
0.588235	0.328571
nkx/brdu	olig/brdu		Shapiro-Wilk normality test					Wilcoxon rank sum test with continuity correction
1	0.863636			nkx/brdu	W = 0.62978, p-value = 0.001241				W = 16, p-value = 0.02652
1	0.833333			olig/brdu	W = 0.93748, p-value = 0.639
0.95122	0.769231
1	0.826087
