# Supplementary material for: Regional heterogeneities of oligodendrocytes underlie biased Ranvier node spacing along single axons in sound localization circuit
Source: eLife. 2025 Dec 23;14:RP106415. doi: 10.7554/eLife.106415 (PMC12726825; doi:10.7554/eLife.106415)
Supplement: Figure 6—source data 1. [file elife-106415-fig6-data1.xlsx]

## Sheet: Figure 6F
Proportion of nodes
Observed frequency					Expected frequency				Chi-square statistic				Chi-square value		p value
	heminode	mature node	total			heminode	mature node			heminode	mature node
GFP_Tract	0	124	124		GFP_Tract	2.1831	121.817		GFP_Tract	2.1831	0.0391236		3.94444		0.139147
eTeNT_Tract	5	155	160		eTeNT_Tract	2.8169	157.183		eTeNT_Tract	1.6919	0.0303208
total	5	279	284
	heminode	mature node	total			heminode	mature node			heminode	mature node
GFP_NL	23	163	186		GFP_NL	54.6579	131.342		GFP_NL	18.3363	7.63062		43.8552		2.9989e-10
eTeNT_NL	111	159	270		eTeNT_NL	79.3421	190.658		eTeNT_NL	12.6317	5.25665
total	134	322	456

## Sheet: Figure 6G
Unmyelinated segments / traced axon in NL (%)
GFP	A3V			PlotsOfDifferences - Plots all Of the Data and Differences
2.97741	22.6221				Condition	n	mean	sd	sem	median	MAD	95CI median
0	7.67763			1	A3V	38	16.02	15.38	2.53	11.65	7.66	7.62 - 17.4
0	7.23012			2	GFP	29	4.55	6.57	1.24	0	0	0 - 5.72
5.70672	32.8734
16.6483	12.6649
4.83827	9.15082			PlotsOfDifferences - Plots all Of the Data and Differences
0	6.94331				Condition	difference	CI_lo	CI_hi	p_median
6.83999	4.88736			1	A3V	10.465	4.197	16.606	<0.001
0	9.23718			2	GFP				1
0	28.9097
10.4498	38.2927
8.09919	12.9885
0	32.6999
9.59947	13.4754
0	0
0	2.90004
0	3.80143
0	10.4874
16.2179	5.27463
25.5883	7.5579
5.72033	16.6063
0	0
0	18.2029
0	65.5729
12.5526	4.17616
0	0			Shapiro-Wilk normality test
0	0				GFP	W = 0.7425, p-value = 9.108e-06
6.76054	10.5722				A3V	W = 0.8444, p-value = 9.638e-05
0	11.6251
	0			Wilcoxon rank sum test with continuity correction
	22.3015				W = 238, p-value = 5.901e-05
	19.5868
	39.4902
	19.1157
	11.6823
	20.021
	59.2106
	20.9211
> shapiro.test(Group1)
Shapiro-Wilk normality test
data: Group1
W = 0.7425, p-value = 9.108e-06
> shapiro.test(Group2)
Shapiro-Wilk normality test
data: Group2
W = 0.8444, p-value = 9.638e-05
> wilcox.test(Group1, Group2)
Wilcoxon rank sum test with continuity correction
data: Group1 and Group2
W = 238, p-value = 5.901e-05
alternative hypothesis: true location shift is not equal to 0

## Sheet: Figure 6H
Internodal length
GFP_Tract	eTeNT_Tract	GFP_NL	eTeNT_NL			PlotsOfDifferences - Plots all Of the Data and Differences
153.39	114.756	58.0742	119.597				Condition	n	mean	sd	sem	median	MAD	95CI median
215.353	138.243	77.5148	99.1158			1	GFP_Tract	62	159.02	40.06	5.13	155.11	20.57	143.6 - 165.91
259.563	138.746	61.3558	87.5938			2	eTeNT_Tract	80	159.94	41.26	4.64	152.17	21.11	147.76 - 166.54
126.315	104.689	78.3177	84.4413
220.618	184.791	84.2368	89.0824
183.123	193.097	79.206	114.004			PlotsOfDifferences - Plots all Of the Data and Differences
210.541	152.229	34.235	113.457				Condition	difference	CI_lo	CI_hi	p_median
158.397	93.7495	68.0561	81.6874			1	GFP_Tract				1
152.916	213.661	119.529	93.3002			2	eTeNT_Tract	-4.15	-18.133	10.953	0.502
123.937	216.991	89.8637	79.7654
189.015	150.759	36.8999	73.4202
123.646	119.131	89.1362	49.5727
118.697	227.521	93.0906	85.0368			PlotsOfDifferences - Plots all Of the Data and Differences
141.358	203.67	84.6543	75.24				Condition	n	mean	sd	sem	median	MAD	95CI median
161.069	171.521	72.2782	97.6358			1	GFP_NL	178	73.08	27.23	2.05	68.97	17.35	63.92 - 70.73
207.245	166.613	86.0738	70.4915			2	eTeNT_NL	178	69.8	23.56	1.77	67	15.94	65.95 - 73.64
199.214	167.136	84.1939	63.7223
122.236	179.277	107.221	68.9936			PlotsOfDifferences - Plots all Of the Data and Differences
169.035	136.349	115.484	58.0016				Condition	difference	CI_lo	CI_hi	p_median
197.916	168.207	104.461	67.1414			1	GFP_NL				1
173.058	112.538	18.779	82.9457			2	eTeNT_NL	-2.049	-7.744	3.923	0.437
143.703	132.172	138.536	89.7312
95.2314	147.918	90.0577	65.4769
125.25	176.576	57.6658	66.8543
144.062	132.895	87.6942	39.0475
140.24	106.297	79.481	33.2373			Shapiro-Wilk normality test
89.0967	104.244	56.2271	37.3357				GFP_Tract	W = 0.97605, p-value = 0.2655
169.412	170.2	10.8912	42.8469				eTeNT_Tract	W = 0.93735, p-value = 0.0006967
171.733	162.72	99.729	46.2787				GFP_NL	W = 0.97124, p-value = 0.0009693
131.154	181.412	26.014	66.1347				eTeNT_NL	W = 0.97757, p-value = 0.005311
59.0551	135.141	45.5865	147.483
208.536	135.689	39.1821	114.565			Wilcoxon rank sum test with continuity correction
164.152	169.055	31.2615	73.6106				Tract	W = 2581, p-value = 0.6793
143.448	123.592	57.123	87.0231				NL	W = 17190, p-value = 0.2323
154.288	133.5	91.704	109.568
263.39	125.71	66.9286	43.5537
143.508	128.78	84.5882	67.8027
141.34	132.099	81.1135	59.5381
227.937	153.943	73.4031	77.6799
188.221	195.963	93.6437	47.4262
160.147	100.472	94.3203	65.3606
137.576	130.01	61.6962	49.33
175.408	136.508	73.428	29.1877
125.652	187.146	80.4719	75.4673
159.301	151.271	125.53	60.2458
148.105	101.161	65.9597	96.128
199.697	171.342	90.8045	57.4493
162.932	145.904	94.6494	113.113
183.325	123.805	185.523	45.2178
164.037	160.202	152.063	84.8431
153.459	141.637	53.7577	55.9784
83.6183	188.558	69.6555	75.8402
178.714	152.105	98.2317	70.3551
62.8564	162.035	131.814	67.6449
139.863	158.02	140.648	81.5882
153.534	143.32	64.2449	50.8939
155.923	126.296	77.5227	31.0553
134.266	222.912	54.6698	46.3283
169.896	142.042	67.796	104.98
151.951	153.925	140.162	64.3978
196.768	143.012	103.838	70.7293
151.544	119.165	72.8419	56.4346
	144.464	39.1981	52.2026
	143.887	48.1159	53.9171
	210.154	53.8515	87.5289
	143.268	61.3707	43.8845
	143.98	87.0875	77.6467
	312.612	55.1484	74.9617
	190.382	72.733	53.0183
	204.42	63.7868	63.1446
	154.367	96.4868	33.6782
	193.735	59.6458	62.3515
	171.106	26.6478	35.8144
	196.588	78.2232	48.56
	90.3306	54.2307	38.7882
	231.803	42.0063	69.3624
	212.283	50.7117	29.3782
	157.985	103.078	38.0392
	289.42	63.7589	48.0935
	242.014	72.1369	56.2076
		58.3414	78.8677
		90.0389	82.9345
		69.538	100.285
		64.6444	106.213
		91.2323	90.6773
		43.5709	86.2207
		43.1834	92.8269
		72.4455	95.8438
		68.2853	93.5868
		98.126	91.7214
		67.3034	85.2729
		54.1775	42.6549
		65.9534	57.3324
		84.57	54.7948
		68.3345	63.6551
		41.9656	56.4312
		76.2536	46.0082
		64.1442	33.3783
		65.4733	66.6007
		49.2736	77.0173
		82.813	90.173
		46.9959	80.3095
		109.428	83.4922
		51.349	56.9511
		98.9225	53.7494
		101.168	75.2771
		125.412	49.1479
		28.3315	60.148
		122.643	45.2556
		66.9492	98.3575
		106.366	74.2389
		99.2026	73.5713
		100.816	69.1895
		97.9861	61.9525
		63.9769	55.3566
		47.7124	77.791
		38.9112	46.1926
		77.1799	69.1517
		83.3263	66.2963
		106.384	64.1231
		129.938	66.2932
		65.4597	53.6658
		63.8517	80.4375
		55.6213	53.3286
		77.3892	104.797
		69.4865	60.8492
		51.4019	150.862
		68.0333	83.049
		94.1992	68.5493
		88.1153	95.1093
		67.4434	92.54
		59.5932	80.4111
		62.2104	65.8249
		41.0971	44.9039
		77.2513	60.4284
		68.5943	75.7471
		63.0413	99.9306
		51.0117	44.6777
		87.0881	99.919
		43.0709	55.0542
		61.4532	42.8423
		28.8187	18.5393
		45.9783	65.7143
		121.731	51.0604
		91.4308	44.3478
		79.6673	42.9671
		48.7953	87.0194
		69.351	77.244
		66.3092	54.4038
		86.6044	79.7502
		70.2754	64.8418
		19.7401	81.3184
		82.4651	84.052
		74.4266	53.9781
		43.1054	57.9623
		45.8788	77.5184
		36.0093	85.9803
		116.643	60.7368
		92.5577	36.3285
		105.048	70.6563
		53.5523	59.9824
		51.8516	59.3687
		55.8822	29.7493
		50.4285	40.3609
		43.0397	67.4921
		93.0617	114.404
		50.8439	70.3812
		73.3686	27.8233
		63.1256	44.9158
		39.433	59.5849
		81.9032	53.2361
		61.2533	125.4
		57.5283	125.352
		39.1579	113.478
		53.2184	65.5231
		60.9484	54.6918
		73.8572	103.485
		61.5005	93.8776
			40.3828
			37.9849

## Sheet: Figure 6I
Length of axonal segments at NL
w/o hemi	w/ hemi	unmyyelinated			PlotsOfDifferences - Plots all Of the Data and Differences
119.597	87.5938	25.7289				Condition	n	mean	sd	sem	median	MAD	95CI median
99.1158	68.9936	41.0138			1	unmyyelinated	72	30.7	20.59	2.44	26.32	11.2	22.49 - 30.67
84.4413	58.0016	57.9677			2	w/ hemi	63	65.38	20.68	2.63	64.84	13.95	58 - 67.49
89.0824	33.2373	45.6507			3	w/o hemi	117	71.66	24.91	2.31	70.36	15.95	64.12 - 75.47
114.004	66.1347	12.3031
113.457	73.6106	36.5521
81.6874	77.6799	26.037			PlotsOfDifferences - Plots all Of the Data and Differences
93.3002	47.4262	21.8986				Condition	difference	CI_lo	CI_hi	p_median
79.7654	65.3606	48.263			1	unmyyelinated	-43.738	-50.666	-36.88	<0.001
73.4202	49.33	24.3217			2	w/ hemi	-6.441	-14.752	1.197	0.124
49.5727	29.1877	30.8795			3	w/o hemi				1
85.0368	96.128	14.5286
75.24	55.9784	58.2694
97.6358	50.8939	44.2917
70.4915	31.0553	8.72196
63.7223	46.3283	47.5843
67.1414	56.4346	33.4741
82.9457	87.5289	19.6018
89.7312	53.0183	23.6234
65.4769	63.1446	21.312
66.8543	33.6782	55.2065
39.0475	69.3624	43.2619
37.3357	29.3782	39.6875
42.8469	86.2207	30.345
46.2787	92.8269	46.9451			Shapiro-Wilk normality test
147.483	42.6549	39.6797				w/o hemi	W = 0.97039, p-value = 0.01087
114.565	57.3324	58.8081				w/ hemi	W = 0.97407, p-value = 0.2043
87.0231	54.7948	26.6653				unmyyelinated	W = 0.79348, p-value = 1.15e-08
109.568	33.3783	25.5476
43.5537	66.6007	33.8406
67.8027	90.173	15.3882
59.5381	75.2771	52.1147			Kruskal-Wallis test and post hoc Steel-Dwass test.
75.4673	49.1479	14.5282					t p
60.2458	60.148	26.6098				w/o hemi vs. w/ hemi	1:2 1.420065 3.304887e-01
57.4493	45.2556	29.6675				w/o hemi vs. unmyyelinated	1:3 9.709422 3.552714e-14
113.113	98.3575	21.585				w/ hemi vs. unmyyelinated	2:3 8.207880 3.552714e-14
45.2178	61.9525	11.5309
84.8431	66.2932	28.7573
75.8402	53.6658	14.1148
70.3551	80.4375	26.8382
67.6449	60.8492	11.2592
81.5882	95.1093	9.4596
104.98	65.8249	19.5703
64.3978	75.7471	23.5182
70.7293	99.9306	18.7096
52.2026	99.919	9.21268
53.9171	65.7143	59.2225
43.8845	51.0604	49.1197
77.6467	44.3478	80.6705
74.9617	79.7502	37.7306
62.3515	64.8418	15.3256
35.8144	85.9803	32.9693
48.56	60.7368	5.35532
38.7882	59.3687	144.217
38.0392	29.7493	13.9288
48.0935	67.4921	25.2429
56.2076	53.2361	23.0714
78.8677	113.478	43.252
82.9345	65.5231	12.5001
100.285	54.6918	38.6525
106.213	84.052	27.4172
90.6773	103.485	10.8482
95.8438	93.8776	16.3842
93.5868		18.0052
91.7214		17.378
85.2729		9.21919
63.6551		44.8417
56.4312		16.2292
46.0082		16.3325
77.0173		28.8374
80.3095		30.9971
83.4922		17.6666
56.9511
53.7494
74.2389
73.5713
69.1895
55.3566
77.791
46.1926
69.1517
66.2963
64.1231
53.3286
104.797
150.862
83.049
68.5493
92.54
80.4111
44.9039
60.4284
44.6777
55.0542
42.8423
18.5393
42.9671
87.0194
77.244
54.4038
81.3184
53.9781
57.9623
77.5184
36.3285
70.6563
59.9824
40.3609
114.404
70.3812
27.8233
44.9158
59.5849
125.4
125.352
40.3828
37.9849

## Sheet: Figure 6K
oligodendrocyte morphology
									Myelin#_NL
Myelin#_NL			Total_NL			Average_NL				PlotsOfDifferences - Plots all Of the Data and Differences
											Condition	n	mean	sd	sem	median	MAD	95CI median
A3V-GFP	A3V-eTeNT		A3V-GFP	A3V-eTeNT		A3V-GFP	A3V-eTeNT			1	A3V-GFP	18	6.61	2.43	0.59	7	1.5	5.0-6
8	4		398.452	246.878		49.8065	61.7194			2	A3V-eTeNT	31	5.65	1.72	0.31	5	1	4.5 - 8
8	6		462.337	376.357		57.7921	62.7262			PlotsOfDifferences - Plots all Of the Data and Differences
8	4		431.73	202.72		53.9662	50.6799				Condition	difference	CI_lo	CI_hi	p_median
7	5		341.704	271.398		48.8149	54.2797			1	A3V-GFP				1
9	7		543.274	368.621		60.3638	52.6602			2	A3V-eTeNT	-1.482	-3	1	0.023
8	5		436.855	234.313		54.6069	46.8627
7	5		524.127	309.004		74.8753	61.8008			Shapiro-Wilk normality test
8	10		272.152	479.979		34.019	47.9979				A3V-GFP	W = 0.93763, p-value = 0.2638
12	8		633.489	273.624		52.7907	34.203				A3V-eTeNT	W = 0.94708, p-value = 0.1296
9	8		504.769	360.998		56.0855	45.1247
4	4		356.727	284.878		89.1818	71.2196			Wilcoxon rank sum test with continuity correction
5	5		538.48	429.789		107.696	85.9579				W = 345.5, p-value = 0.1654
6	4		262.446	408.076		43.741	102.019
3	9		305.493	409.259		101.831	45.4732		Total_NL
3	6		184.21	330.956		61.4032	55.1594			PlotsOfDifferences - Plots all Of the Data and Differences
6	2		349.819	158.816		58.3031	79.4078				Condition	n	mean	sd	sem	median	MAD	95CI median
4	3		298.896	221.942		74.7239	73.9807			1	A3V-GFP	18	394.64	122.5	29.71	377.59	95.09	330.96 - 408.08
4	5		258.6	448.421		64.6499	89.6842			2	A3V-eTeNT	31	367.6	101.85	18.59	369.28	79.14	302.19 - 471.05
	6			491.895			81.9826			PlotsOfDifferences - Plots all Of the Data and Differences
	5			405.978			81.1956				Condition	difference	CI_lo	CI_hi	p_median
	5			352.692			70.5384			1	A3V-GFP				1
	6			312.252			52.042			2	A3V-eTeNT	-12.721	-109.682	78.341	0.73
	5			364.62			72.924
	4			372.422			93.1055			Shapiro-Wilk normality test
	6			551.817			91.9695				A3V-GFP	W = 0.97125, p-value = 0.8208
	6			589.183			98.1972				A3V-eTeNT	W = 0.98912, p-value = 0.9842
	6			466.901			77.8168
	5			381.76			76.352			Wilcoxon rank sum test with continuity correction
	8			465.868			58.2335				W = 304, p-value = 0.6147
	7			454.888			64.984
	6			369.277			61.5462		Average_NL
										PlotsOfDifferences - Plots all Of the Data and Differences
											Condition	n	mean	sd	sem	median	MAD	95CI median
										1	A3V-GFP	18	63.59	19.43	4.71	58.05	7.42	58.23 - 76.35
										2	A3V-eTeNT	31	67.8	17.53	3.2	64.98	12.94	53.96 - 69.76
										PlotsOfDifferences - Plots all Of the Data and Differences
											Condition	difference	CI_lo	CI_hi	p_median
										1	A3V-GFP				1
										2	A3V-eTeNT	7.889	-4.818	19.546	0.25
										Shapiro-Wilk normality test
											A3V-GFP	W = 0.89634, p-value = 0.04962
											A3V-eTeNT	W = 0.97499, p-value = 0.6644
										Wilcoxon rank sum test with continuity correction
											W = 231, p-value = 0.328

## Sheet: Figure 6M
Cell density ratio
Nkx2.2
GFP_e15_nkx	TeNT_e15_nkx			PlotsOfDifferences - Plots all Of the Data and Differences
1.69444	1.01587				Condition	n	mean	sd	sem	median	MAD	95CI median
1.50602	1.05556			1	GFP_e15_nkx	4	1.54	0.12	0.07	1.54	0.09	1.4 - 1.69
1.4	1.13793			2	TeNT_e15_nkx	6	1.14	0.12	0.05	1.1	0.07	1.04 - 1.27
1.57143	1.22222
	1.32353			PlotsOfDifferences - Plots all Of the Data and Differences
	1.06452				Condition	difference	CI_lo	CI_hi	p_median
				1	GFP_e15_nkx				1
				2	TeNT_e15_nkx	-0.426	-0.593	-0.255	0.027
				Shapiro-Wilk normality test
					GFP_e15_nkx	W = 0.99806, p-value = 0.9939
					TeNT_e15_nkx	W = 0.91876, p-value = 0.4965
				Levene's Test
					0.9773
				Two-tailed Student’s T-test
					t = 5.2697, df = 8, p-value = 0.0007556
BrdU
GFP_e15_brdu	TeNT_e15_brdu			PlotsOfDifferences - Plots all Of the Data and Differences
1.59524	1.16				Condition	n	mean	sd	sem	median	MAD	95CI median
2	1.11538			1	GFP_e15_brdu	3	1.72	0.24	0.17	1.6	0.03	1.56 - 2
1.5625	1.02564			2	TeNT_e15_brdu	6	1.19	0.12	0.05	1.18	0.1	1.07 - 1.33
	1.19048
	1.33333			PlotsOfDifferences - Plots all Of the Data and Differences
	1.32143				Condition	difference	CI_lo	CI_hi	p_median
				1	GFP_e15_brdu				1
				2	TeNT_e15_brdu	-0.503	-0.885	-0.268	0.04
				Shapiro-Wilk normality test
					GFP_e15_brdu	W = 0.80578, p-value = 0.1284
					TeNT_e15_nkx	W = 0.93632, p-value = 0.6297
				Levene's Test
					0.5772
				Two-tailed Student’s T-test
					t = 4.5333, df = 7, p-value = 0.002689

## Sheet: Figure 6 - sup1
Proportion of nodes
Observed frequency					Expected frequency				Chi-square statistic				Chi-square value		p value
	heminode	mature node	total			heminode	mature node			heminode	mature node
GFP_Tract	0	124	124		GFP_Tract	1.64602	122.354		GFP_Tract	1.64602	0.0221437		3.69612		0.157542
sparse_Tract	3	99	102		eTeNT_Tract	1.35398	100.646		eTeNT_Tract	2.00104	0.0269198
total	3	223	226
	heminode	mature node	total			heminode	mature node			heminode	mature node
GFP_NL	23	163	186		GFP_NL	24.8	161.2		GFP_NL	0.130645	0.0200993		0.368097		0.831896
sparse_NL	19	110	129		eTeNT_NL	17.2	111.8		eTeNT_NL	0.188372	0.0289803
total	42	273	315
Unmyelinated segments
GFP_NL	sparse_NL		PlotsOfDifferences - Plots all Of the Data and Differences
2.97741	0			Condition	n	mean	sd	sem	median	MAD	95CI median
0	15.9779		1	GFP_NL	29	4.55	6.57	1.24	0	0	0 - 5.72
0	0		2	sparse_NL	26	2.52	5.79	1.16	0	0	0 - 0
5.70672	0		PlotsOfDifferences - Plots all Of the Data and Differences
16.6483	12.332			Condition	difference	CI_lo	CI_hi	p_median
4.83827	2.33982		1	GFP_NL				1
0	22.7338		2	sparse_NL	-1.237	-5.72		1
6.83999	0
0	0
0	0
10.4498	5.40718
8.09919	0
0	0
9.59947	0
0	6.69895
0	0
0	0
0	0
16.2179	0
25.5883	0		Shapiro-Wilk normality test
5.72033	0			GFP_NL	W = 0.7425, p-value = 9.108e-06
0	0			sparse_NL	W = 0.51525, p-value = 3.565e-08
0	0
0	0		Wilcoxon rank sum test with continuity correction
12.5526	0			W = 461, p-value = 0.09706
0	0
0
6.76054
0

## Sheet: infection efficiency
A3V-eTeNT infection efficiency
negative cells	positive cells	all	rate
16	361	377	95.756
98	502	600	83.6667
25	206	231	89.1775
32	261	293	89.0785
5	55	60	91.6667
22	172	194	88.6598
			average		SEM
			89.6675	±	1.61945
